# Supplementary material for: GM-CSF Expression and Macrophage Polarization in Joints of Undifferentiated Arthritis Patients Evolving to Rheumatoid Arthritis or Psoriatic Arthritis
Source: PubMed Central journal article supplement (PMC7925849; doi:10.3389/fimmu.2020.613975), 2021-02-17
Supplement: Table_1.pdf [file Table_1.pdf]

| Pathotypes: n (%) | UA naïve<br>n=7 | UA + csDMARDs<br>n=9 | UA>RA<br>n=8 | UA>PsA<br>n=9 | RA<br>n=12 | PsA<br>n= 10 |
|-------------------|-----------------|----------------------|--------------|---------------|------------|--------------|
| Lympho-Myeloid    | 3 (42.9)        | 3 (33.4)             | 4 (50)       | 4 (44.5)      | 9 (75)     | 4 (40)       |
| Difusse-Myeloid   | 4 (57.1)        | 5 (55.6)             | 3 (37.5)     | 4 (44.5)      | 2 (16.6)   | 5 (50)       |
| Pauci-immune      | 0               | 1 (11)               | 1 (12.5)     | 1 (11)        | 1 (8.4)    | 1 (10)       |

**Supplementary Table 1. Synovial pathotypes.**

UA: Undifferentiated Arthritis (naïve and treated con conventional synthetic DMARDs); UA>RA: Undifferentiated Arthritis evolving to RA after the follow-up; UA>PsA: Undifferentiated Arthritis evolving to PsA after the follow-up. RA: Rheumatoid Arthritis; PsA: Psoriatic Arthritis.
